# Supplementary material
Source: ML conference proceedings conference paper supplement (https://proceedings.mlr.press/v70/miao17a.html)
Supplement: Supplementary file [file miao17a-supp.pdf]

# Discovering Discrete Latent Topics with Neural Variational Inference

## A. Discovered Topics

Table 1 presents the topics by the words with highest probability (top-10 words) achieved by different neural topic models on *20NewsGroups* dataset.

| <i>Space</i> | <i>Religion</i> | <i>Encryption</i> | <i>Sport</i> | <i>Science</i> |
|--------------|-----------------|-------------------|--------------|----------------|
| space        | god             | encryption        | player       | science        |
| satellite    | atheism         | device            | hall         | theory         |
| april        | exist           | technology        | defensive    | scientific     |
| sequence     | atheist         | protect           | team         | universe       |
| launch       | moral           | americans         | average      | experiment     |
| president    | existence       | chip              | career       | observation    |
| station      | marriage        | use               | league       | evidence       |
| radar        | system          | privacy           | play         | exist          |
| training     | parent          | industry          | bob          | god            |
| committee    | murder          | enforcement       | year         | mistake        |

(a) Topics learned by GSM.

| <i>Space</i> | <i>Religion</i> | <i>Lawsuit</i> | <i>Vehicle</i> | <i>Science</i> |
|--------------|-----------------|----------------|----------------|----------------|
| moon         | atheist         | homicide       | bike           | theory         |
| lunar        | life            | gun            | motorcycle     | science        |
| orbit        | eternal         | rate           | dod            | gary           |
| spacecraft   | christianity    | handgun        | insurance      | scientific     |
| billion      | hell            | crime          | bmw            | sun            |
| launch       | god             | firearm        | ride           | orbit          |
| space        | christian       | weapon         | dealer         | energy         |
| hockey       | atheism         | knife          | oo             | experiment     |
| cost         | religion        | study          | car            | mechanism      |
| nasa         | brian           | death          | buy            | star           |

(b) Topics learned by GSB.

| <i>Aerospace</i> | <i>Crime</i> | <i>Hardware</i> | <i>Technology</i> | <i>Science</i> |
|------------------|--------------|-----------------|-------------------|----------------|
| instruction      | gun          | drive           | technology        | science        |
| spacecraft       | weapon       | scsi            | americans         | hell           |
| amp              | crime        | ide             | pit               | scientific     |
| pat              | firearm      | scsus           | encryption        | evidence       |
| wing             | criminal     | hd              | policy            | physical       |
| plane            | use          | go              | industry          | eternal        |
| algorithm        | control      | controller      | protect           | universe       |
| db               | handgun      | tape            | privacy           | experiment     |
| reduce           | law          | datum           | product           | reason         |
| orbit            | kill         | isa             | approach          | death          |

(c) Topics learned by RSB.

Table 1. Topics learned by neural topic models on *20NewsGroups* dataset.

## B. Topic Diversity

An issue that exists in both probabilistic and neural topic models is redundant topics. In neural models it straightforwardly regularises the distance between each of the topic vectors in order to diversify the topics. Following Xie et al. (2015), we apply such topic diversity regularisation while carrying out neural variational inference. We use the cosine distance to measure the distance between two topics  $a(t_i, t_j) = \arccos(\frac{|t_i \cdot t_j|}{\|t_i\| \cdot \|t_j\|})$ . The mean angle of all pairs of  $K$  topics is  $\zeta = \frac{1}{K^2} \sum_i \sum_j a(t_i, t_j)$ , and the variance is  $\nu = \frac{1}{K^2} \sum_i \sum_j (a(t_i, t_j) - \zeta)^2$ . We add the following topic diversity regularisation to the variational objective:

$$\mathcal{J} = \mathcal{L} + \lambda(\zeta - \nu),$$

where  $\lambda$  is a hyper-parameter for the regularisation that is empirically set as 0.1. Though in practise diversity regularisation does not provide a significant improvement to perplexity (2~5 in most cases), it helps reduce topic redundancy and can be easily applied on topic vectors instead of the simplex over the full vocabulary.
